# Supplementary material for: Single-atom Ni encapsulated in N-doped porous carbon microspheres for enhanced catalytic transfer hydrogenation
Source: Royal Society of Chemistry journal article supplement (doi:10.1039/d5gc06240c), 2026-01-01

## Supplementary Information

### **Single-atom Ni encapsulated in N-doped porous carbon microspheres for enhanced catalytic transfer hydrogenation**

Sijia Pei,<sup>a</sup> Yuanyuan Yue,<sup>a</sup> Wenjun Du,<sup>a</sup> Liwei Niu,<sup>b,\*</sup> Zhuo Li,<sup>a</sup> Dawei Liu,<sup>a,\*</sup>

Yunteng Qu,<sup>c</sup> Long Xu,<sup>a,\*</sup> Xiaoxun Ma<sup>a</sup>

<sup>a</sup> School of Chemical Engineering, Northwest University, International Science & Technology Cooperation Base of Most for Clean Utilization of Hydrocarbon Resources, Chemical Engineering Research Center of the Ministry of Education for Advanced Use Technology of Shanbei Energy, Shaanxi Research Center of Engineering Technology for Clean Coal Conversion, Xi'an 710069, China

<sup>b</sup> School of Chemistry and Chemical Engineering, Qilu University of Technology (Shandong Academy of Sciences), Jinan, 250353, China

<sup>c</sup> International Collaborative Center on Photoelectric Technology and Nano Functional Materials, Institute of Photonics & Photon-Technology, Northwest University, Xi'an 710069, China

Corresponding Author:

Liwei Niu, E-mail address: niuliwei@qlu.edu.cn

Dawei Liu, E-mail address: dwliu@nwu.edu.cn

Long Xu, E-mail address: longxuxulong@163.com

## **Table of Contents**

**Supplementary Experimental section**

**Supplementary Figures**

**Supplementary Tables**

**Supplementary Gas Chromatography and Mass Spectrometry**

## 1. Supplementary Experimental section

### 1.1 Chemicals

Melamine (98%), formaldehyde (37 wt% aqueous solution), toluene (99%), D-(+)-glucose (99%) and nickel (II) nitrate hexahydrate (99%) were purchased from Tianjin Kemiou Chemical Reagent Co., Ltd. F127, nitroarenes, N-heterocycles and organic solvents were purchased from Shanghai Aladdin Biochemical Technology Co., Ltd. All reagents were used as received without further purification.

### 1.2 Emulsifier preparation

Typically, 24 mL of n-hexanol, 115.5 mL of cyclohexane, 28.5 mL of TX-10, and 5.1 g of deionized water were added to a round-bottomed flask and stirred at room temperature for 30 min. Then, 9.8138 g of tetraethyl orthosilicate (TEOS) was added dropwise, and the mixture was stirred for an additional 5 h. Subsequently, 1.5 mL of aqueous ammonia solution was added, and the reaction mixture was stirred for 18 h. The reaction was then terminated by adding 15 mL of ethanol. The resultant suspension was centrifuged, and the precipitate was washed five times with ethanol, followed by drying at 100 °C for 4 h, obtaining silica nanospheres with diameters in the range of approximately 60-80 nm. Next, 1.5 g of the as-prepared silica nanospheres was dispersed in 40 mL of toluene. A mixture containing 4.5 mmol of trimethoxymethylsilane  $(\text{MeO})_3\text{SiCH}_3$  and 4.5 mmol of triethylamine  $(\text{C}_2\text{H}_5)_3\text{N}$  was then added. The reaction mixture was refluxed at 120 °C for 4 h. The solid product was collected by centrifugation, washed with toluene, and dried under vacuum to yielding methyl-modified silica particles, which were used as particle emulsifier.

## 2. Supplementary Figures

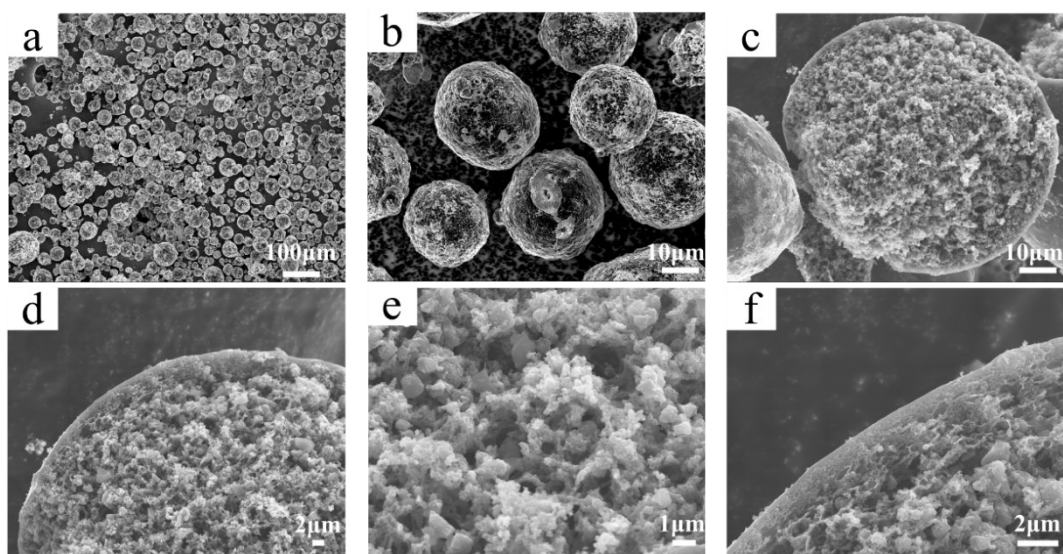

**Fig. S1.** SEM images of 1.3Ni@NHC-500

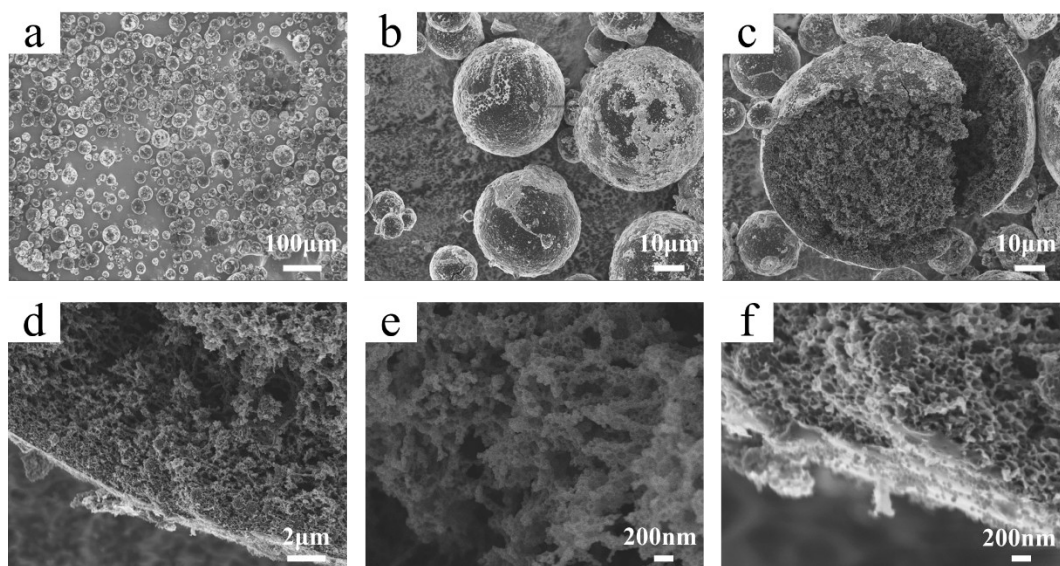

**Fig. S2.** SEM images of 1.3Ni@NHC-700

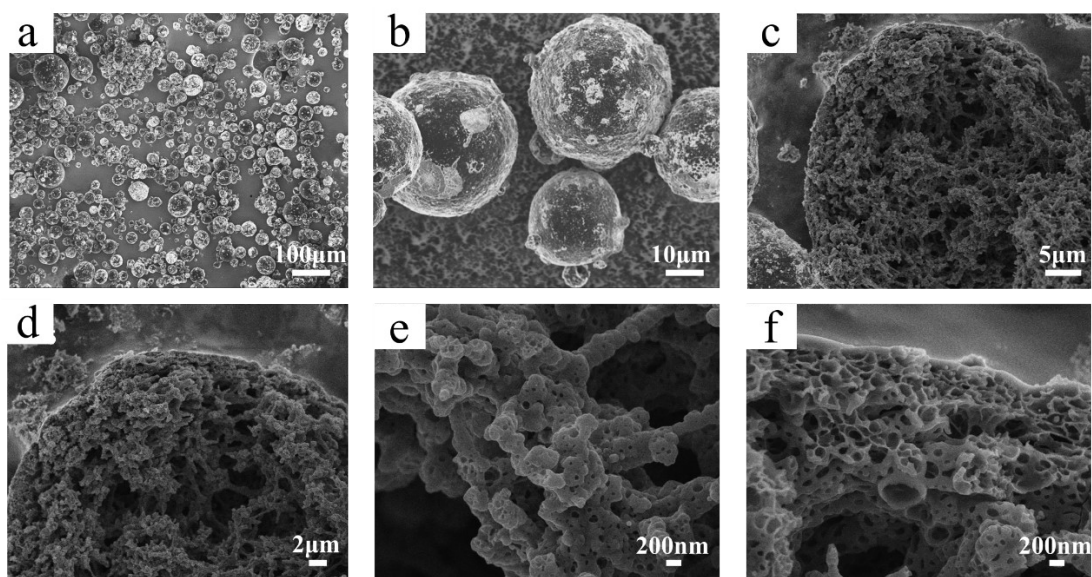

**Fig. S3.** SEM images of 1.3Ni@NHC-800

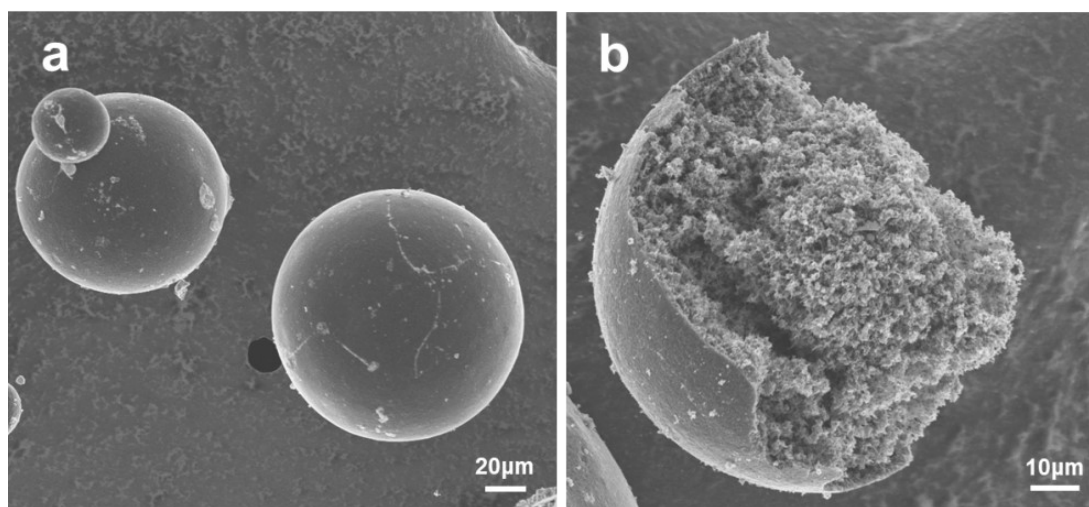

**Fig. S4.** SEM images of 4.9Ni@NHC-600

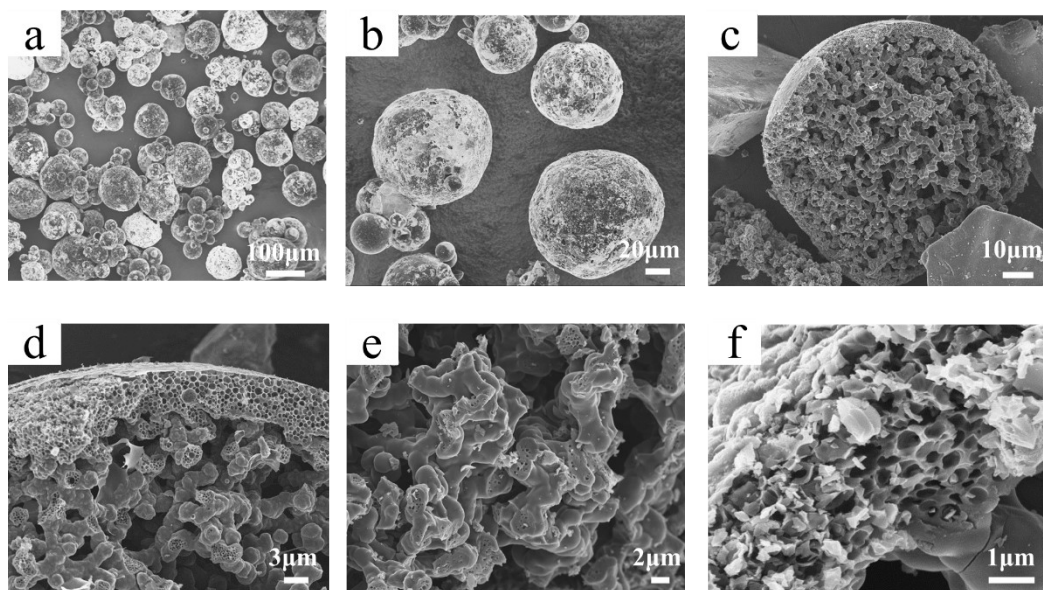

**Fig. S5.** SEM images of NHC-600

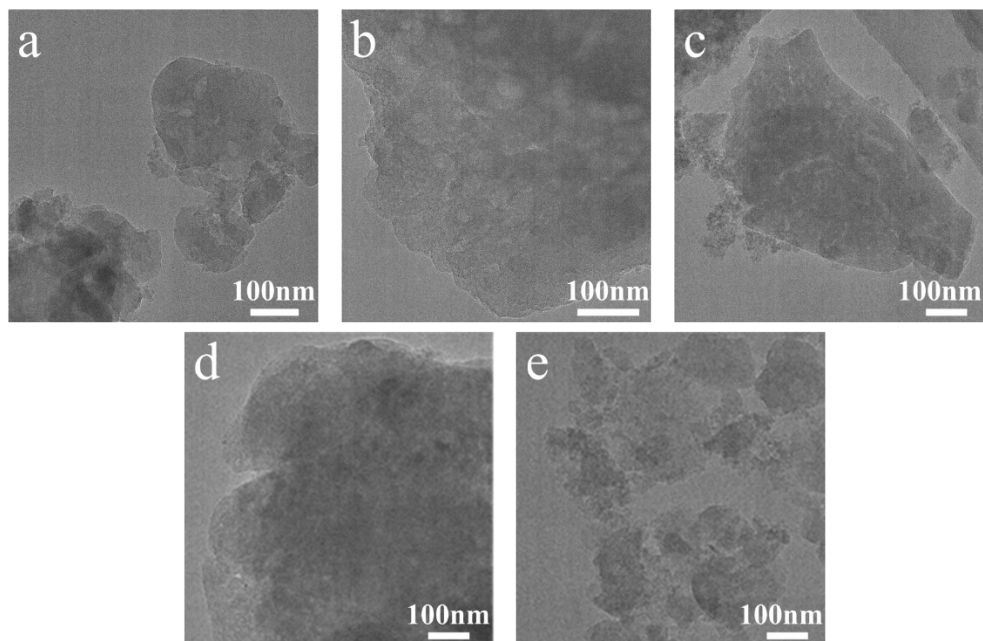

**Fig. S6.** TEM images of NHC-600 and 1.3Ni@NHC-T. (a) 1.3Ni@NHC-500, (b) 1.3Ni@NHC-600, (c) 1.3Ni@NHC-700, (d) 1.3Ni@NHC-800, (e) NHC-600

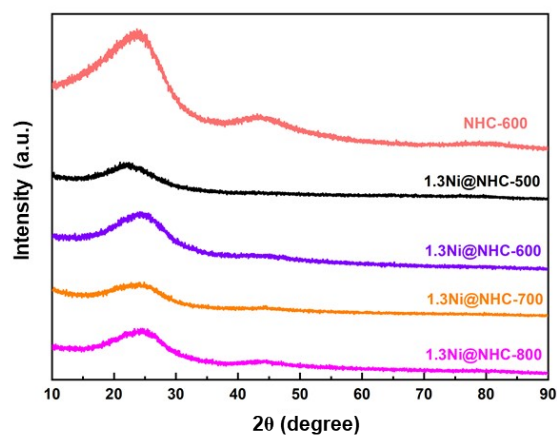

**Fig. S7.** XRD patterns of NHC-600 and 1.3Ni@NHC-T

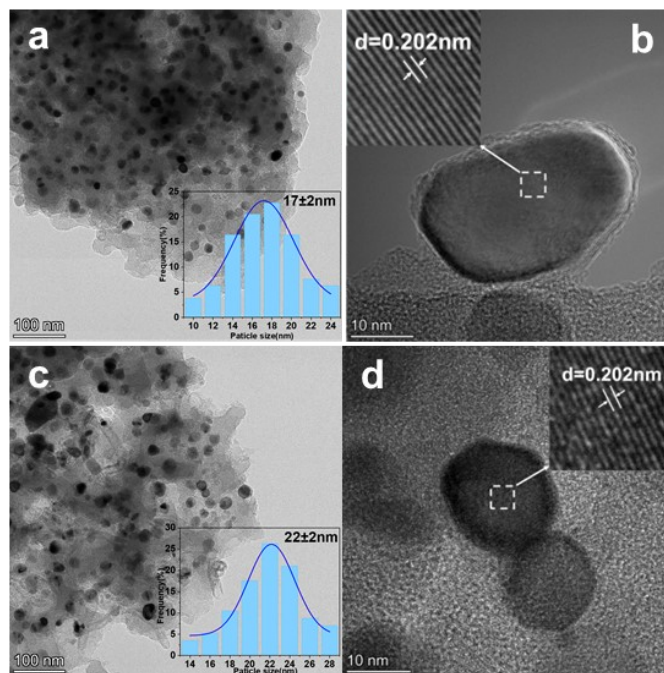

**Fig. S8.** (a-b) TEM images of 4.9Ni@NHC-600, (c-d) TEM images of 22Ni@NHC-600

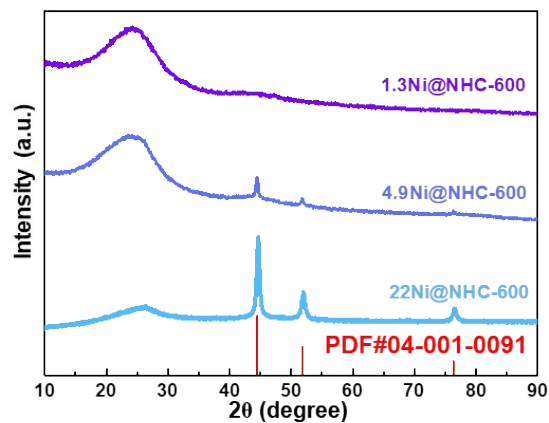

**Fig. S9.** XRD patterns of xNi@NHC-600

As shown in Fig. S9, diffraction peaks at  $2\theta = 44.5^\circ$ ,  $51.8^\circ$ , and  $76.4^\circ$  could be assigned to the (111), (200), and (220) planes of metallic Ni nanocrystal, confirming the presence of Ni NPs in the 4.9Ni@NHC-600 and 22Ni@NHC-600 catalysts.



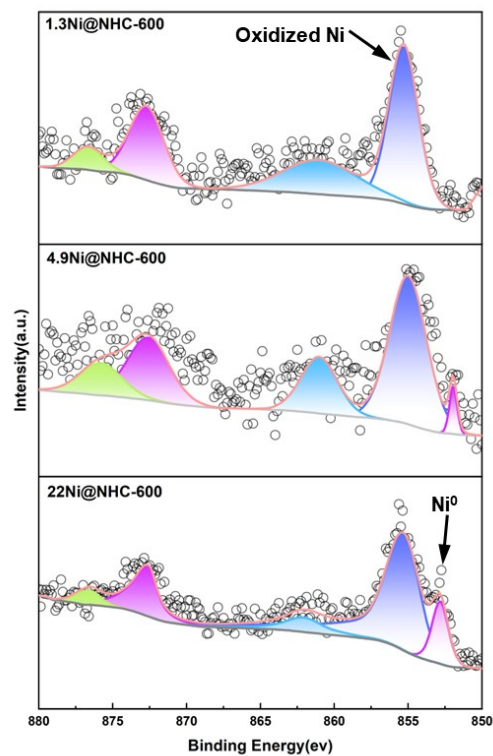

**Fig. S10.** XPS Ni<sub>2p</sub> spectra of xNi@NHC-600

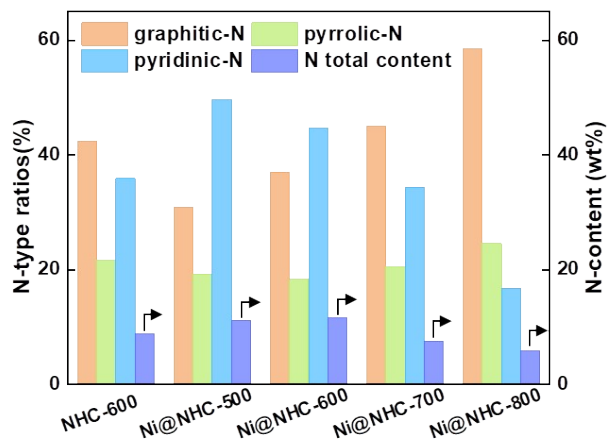

**Fig. S11.** Quantitative analysis of N species in NHC-600 and 1.3Ni@NHC-T

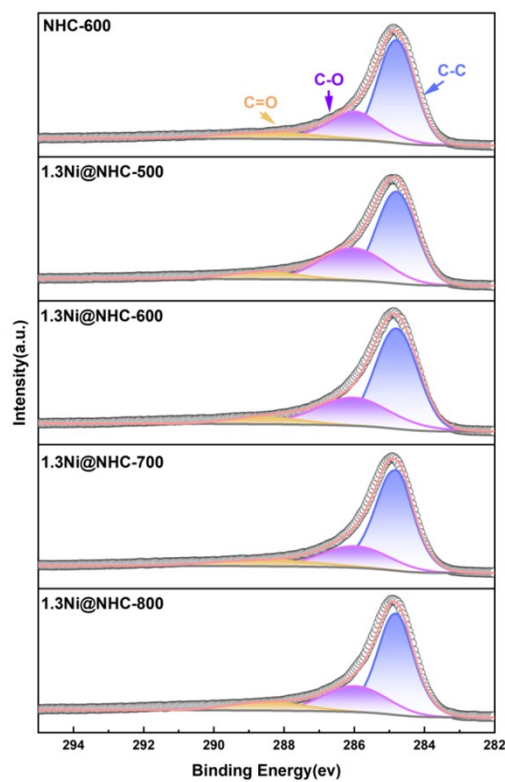

**Fig. S12.** C1s spectra of NHC-600 and 1.3Ni@NHC-T

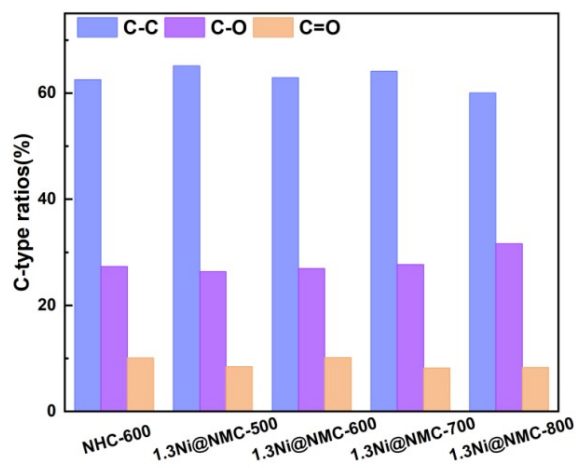

**Fig. S13.** Quantitative analysis of C species in NHC-600 and 1.3Ni@NHC-T

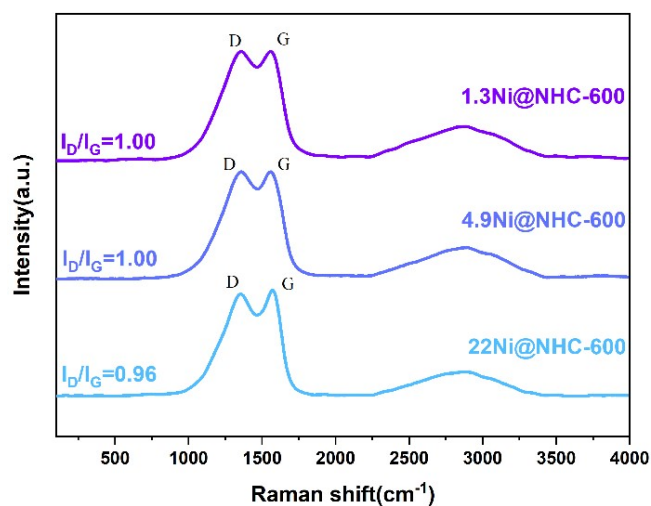

**Fig. S14.** Raman spectra of  $x\text{Ni}@NHC-600$

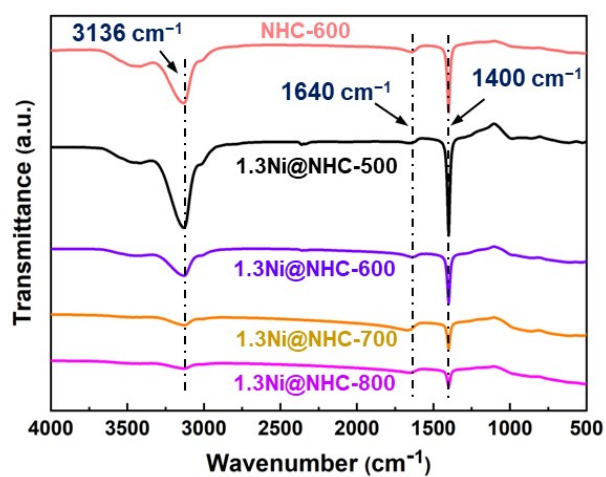

**Fig. S15.** FT-IR spectrum of  $NHC-600$  and  $1.3\text{Ni}@NHC-T$

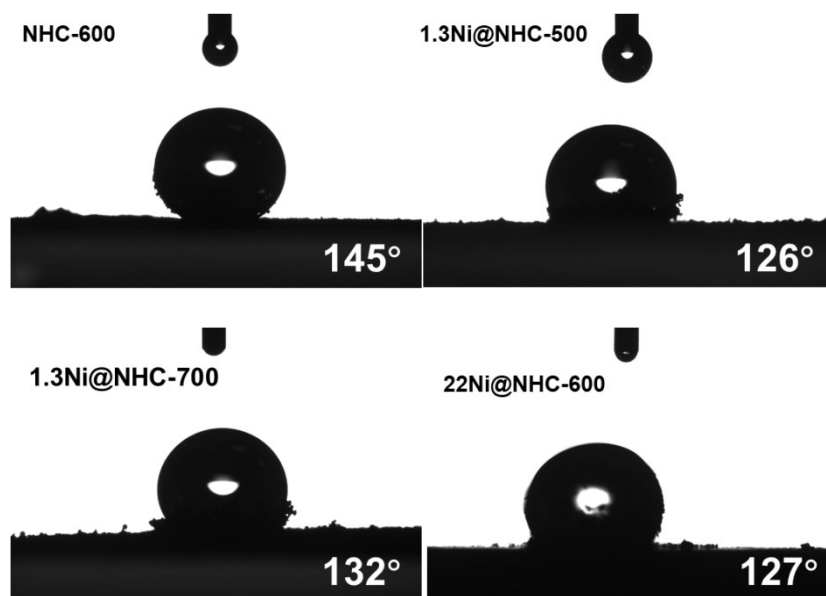

**Fig. S16.** Water contact angles of various catalysts

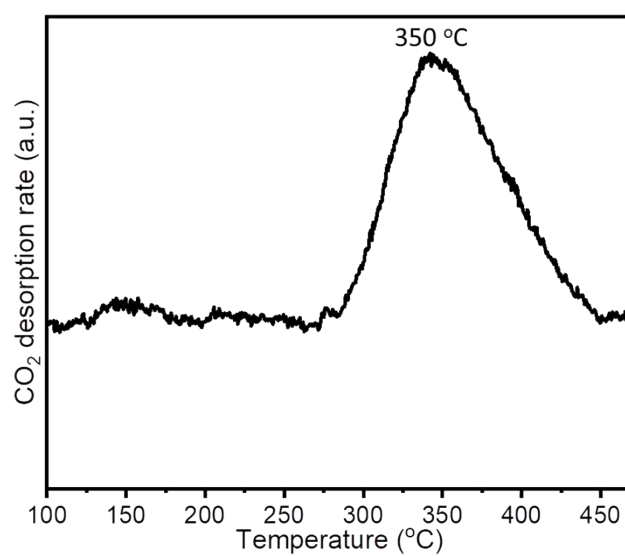

**Fig. S17.** CO<sub>2</sub>-TPD of NHC-600

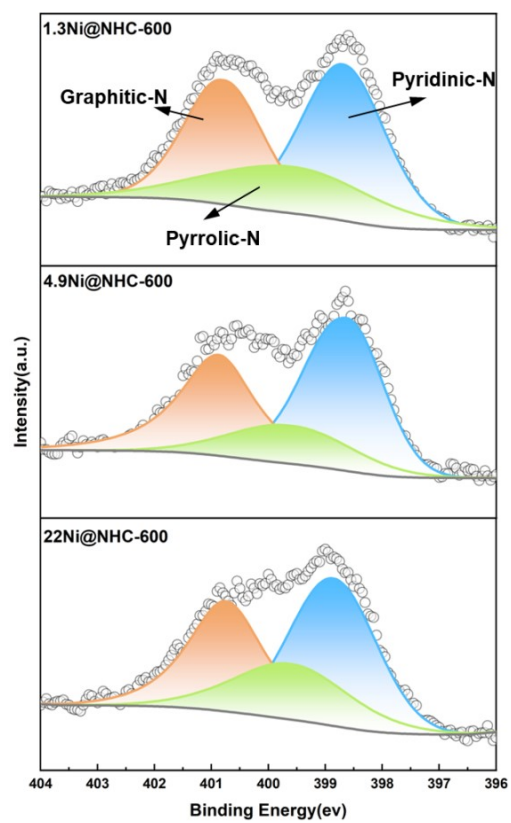

**Fig. S18.** XPS N1s spectra of xNi@NHC-600

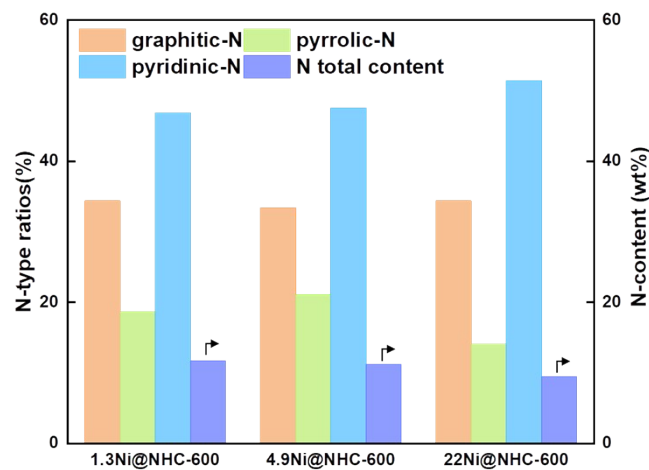

**Fig. S19.** Quantitative analysis of N species in xNi@NHC-600

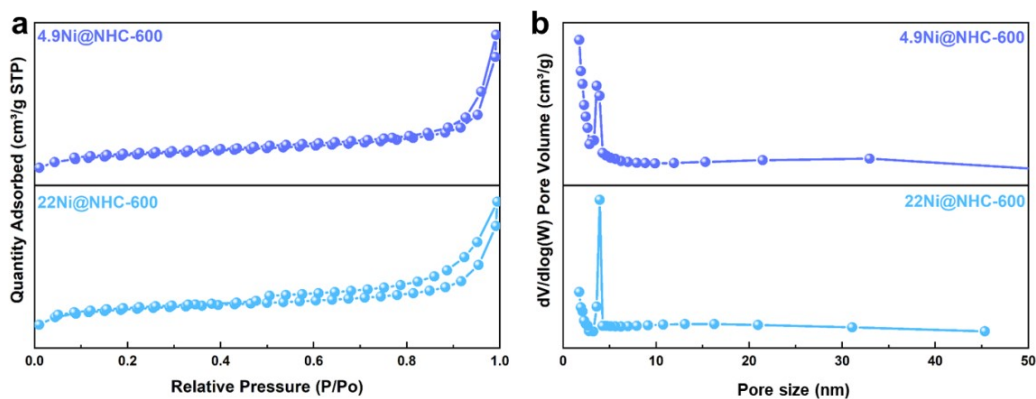

**Fig. S20.** (a) N<sub>2</sub> adsorption-desorption isotherms and (b) pore size distribution curves of xNi@NHC-600

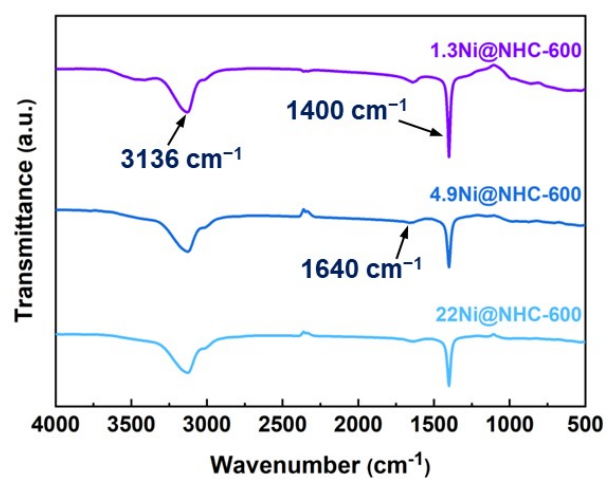

**Fig. S21.** FT-IR spectrum of xNi@NHC-600

FT-IR analysis of xNi@NHC-600 catalysts suggests that no significant changes in the overall peak pattern, indicating that the content of Ni does not significantly alter the surface functional group composition.

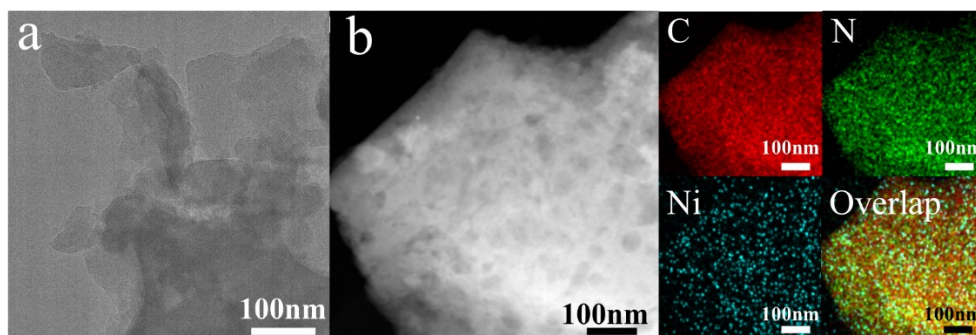

**Fig. S22.** (a) TEM image of 1.3Ni@NHC-600 after 9 cycles, (b) HAADF-TEM image and corresponding elemental mappings

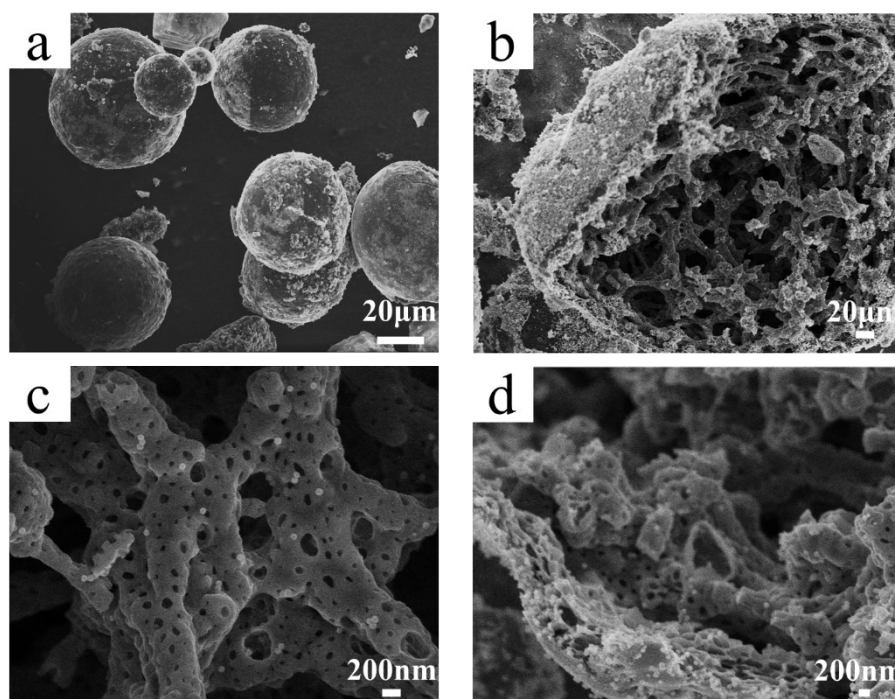

**Fig. S23.** SEM images of 1.3Ni@NHC-600 after 9 cycles



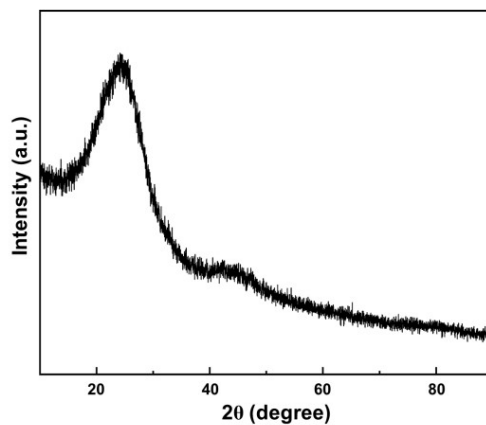

**Fig. S24.** XRD spectrum of 1.3Ni@NHC-600 after 9 cycles

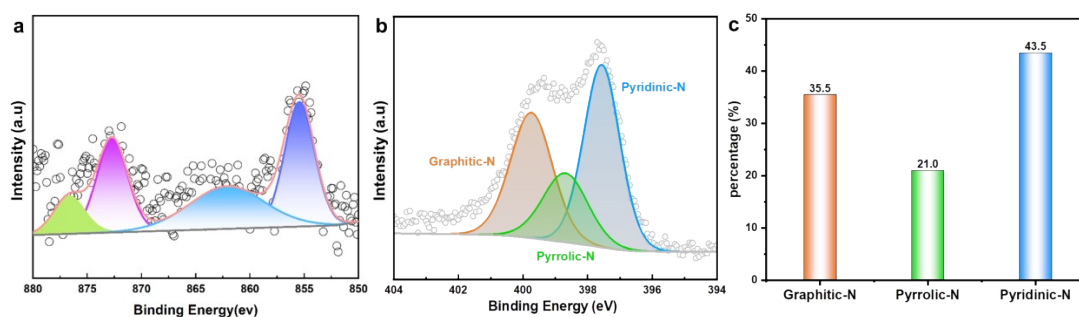

**Fig. S25.** XPS results of 1.3Ni@NHC-600 after 9 cycles. (a) Ni2*p* spectrum, (b) N1*s* spectrum, and (c) percentages of N-species

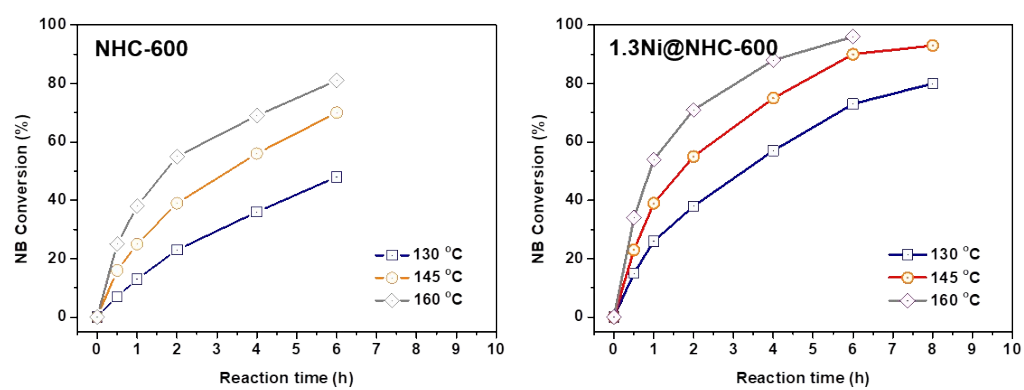

**Fig. S26.** Nitrobenzene (NB) conversions as a function of reaction time over NHC-600 and 1.3Ni@NHC-600

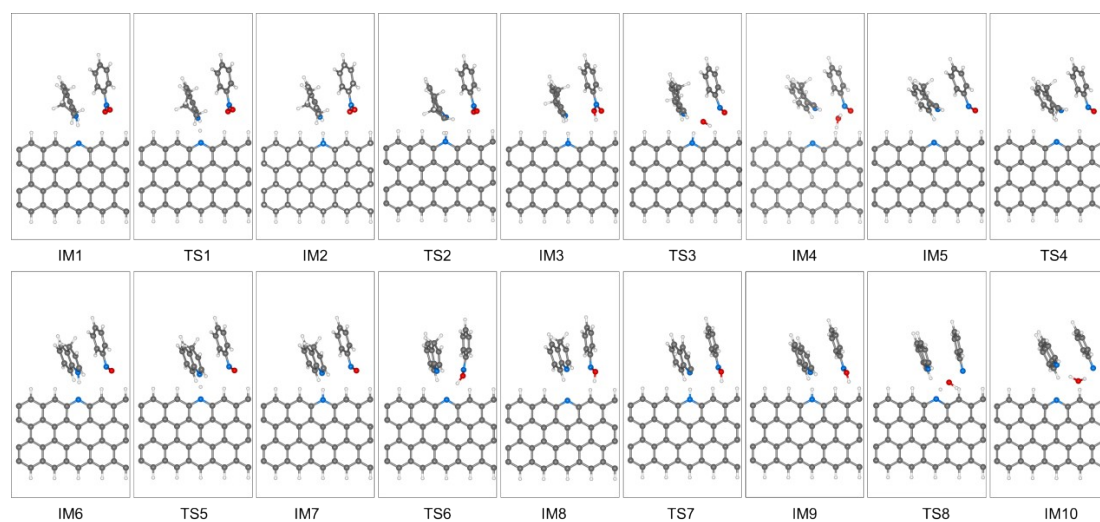

**Fig. S27.** Structural evolution of 1,2,3,4-tetrahydroquinoline dehydrogenation and nitrobenzene hydrogenation on the NHC-600 catalyst

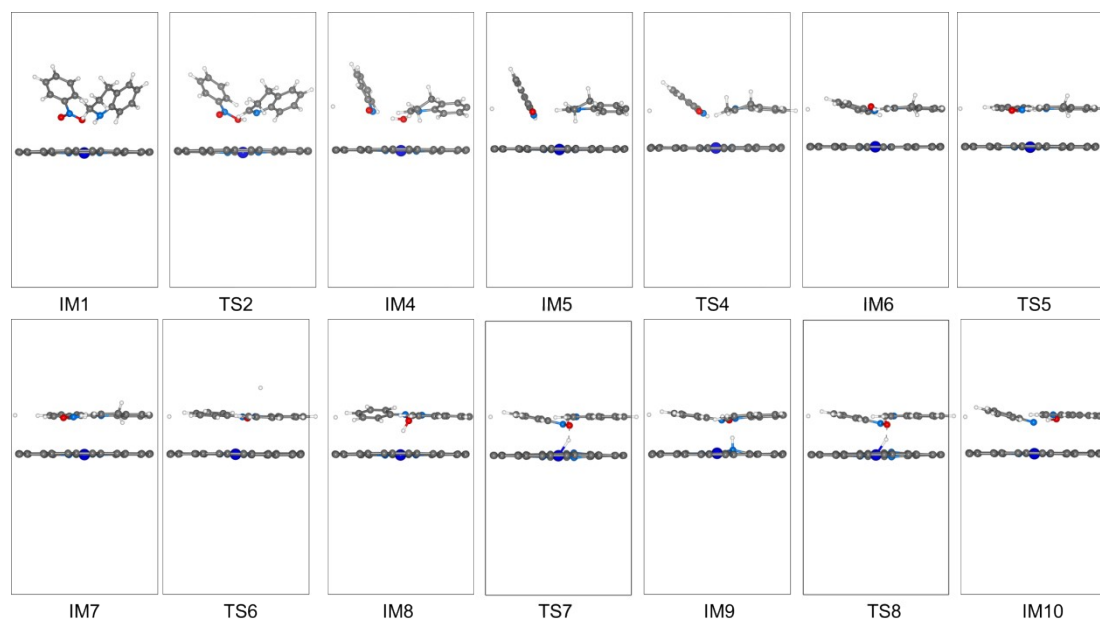

**Fig. S28.** Structural evolution of 1,2,3,4-tetrahydroquinoline dehydrogenation and nitrobenzene hydrogenation on the 1.3Ni@NHC-600 catalyst

### 3. Supplementary Tables

**Table S1.** Elemental analysis of various catalysts

| Catalysts                  | N<br>(wt%) | C<br>(wt%) | Ni <sup>a</sup><br>(wt%) | N<br>(at%) | C<br>(at%) | Ni<br>(at%) |
|----------------------------|------------|------------|--------------------------|------------|------------|-------------|
| NHC-600                    | 8.81       | 66.86      | —                        | 10.15      | 89.85      | —           |
| 1.3Ni@NHC-500              | 11.19      | 36.84      | 1.59                     | 20.51      | 78.79      | 0.70        |
| 1.3Ni@NHC-600              | 11.71      | 60.11      | 1.36                     | 14.25      | 85.35      | 0.40        |
| 1.3Ni@NHC-700              | 7.62       | 62.17      | 1.30                     | 9.47       | 90.14      | 0.39        |
| 1.3Ni@NHC-800              | 5.83       | 68.66      | 1.16                     | 6.76       | 92.92      | 0.32        |
| 4.9Ni@NHC-600              | 11.16      | 66.15      | 4.94                     | 12.47      | 86.21      | 1.32        |
| 22Ni@NHC-600               | 11.12      | 61.17      | 22.15                    | 12.67      | 81.30      | 6.03        |
| 1.3Ni@NHC-600 <sup>b</sup> | 11.69      | 60.12      | 1.33                     | 14.23      | 85.38      | 0.39        |

<sup>a</sup> Results determined by ICP-OES. <sup>b</sup> After nine cycles. The atomic ratio of N, C and Ni elements is calculated from the results of ICP.

**Table S2.** EXAFS fitting parameters at the Ni K-edge for 1.3Ni@NHC-600 and 4.9Ni@NHC-600

| Catalysts     | Shell  | N <sup>a</sup> | R (Å) <sup>b</sup> | $\sigma^2$ (Å <sup>2</sup> ·10 <sup>-3</sup> ) <sup>c</sup> | $\Delta E_0$ (eV) <sup>d</sup> | R-factor |
|---------------|--------|----------------|--------------------|-------------------------------------------------------------|--------------------------------|----------|
| 1.3Ni@NHC-600 | Ni-N/O | 3.9±0.2        | 1.88±0.02          | 5.1±3.0                                                     | -1.4±0.2                       | 0.015    |
| 4.9Ni@NHC-600 | Ni-N/O | 2.1±0.2        | 1.79±0.02          | 5.6±3.0                                                     | -1.9±0.2                       | 0.012    |
|               | Ni-Ni  | 5.9±0.2        | 2.46±0.02          | 6.3±3.0                                                     | -2.2±0.2                       |          |

<sup>a</sup>N: coordination numbers; <sup>b</sup>R: bond distance; <sup>c</sup> $\sigma^2$ : Debye-Waller factors; <sup>d</sup> $\Delta E_0$ : the inner potential correction.

**Table S3.** Textural properties of various catalysts

| Catalysts     | S <sub>BET</sub><br>(m <sup>2</sup> /g) | Pore volume<br>(cm <sup>3</sup> /g) | Pore size<br>(nm) |
|---------------|-----------------------------------------|-------------------------------------|-------------------|
| NMC-600       | 320                                     | 0.26                                | 13.5              |
| 1.3Ni@NMC-500 | 290                                     | 1.09                                | 18.1              |
| 1.3Ni@NHC-600 | 324                                     | 0.48                                | 16.3              |
| 1.3Ni@NMC-700 | 328                                     | 0.53                                | 16.6              |
| 1.3Ni@NMC-800 | 294                                     | 0.45                                | 13.5              |
| 4.9Ni@NMC-600 | 361                                     | 0.35                                | 3.6               |
| 22Ni@NMC-600  | 347                                     | 0.26                                | 3.9               |

**Table S4.** Transfer hydrogenation reaction between nitrobenzene and 1,2,3,4-tetrahydroquinoline over various catalysts

$$\text{A} + \text{B} \xrightarrow[\text{Catalyst}]{\text{N}_2} \text{a} + \text{b} + 2\text{H}_2\text{O}$$

| Entry | Solvent                    | Con. of A (%) | Con. of B (%) | Yield of a (%) | Yield of b (%) |
|-------|----------------------------|---------------|---------------|----------------|----------------|
| 1     | Blank                      | <1            | <1            | —              | —              |
| 2     | SiO <sub>2</sub>           | <1            | <1            | —              | —              |
| 3     | NHC-600                    | 73            | 72            | 73             | 72             |
| 4     | NHC-700                    | 56            | 57            | 56             | 57             |
| 5     | NHC-800                    | 39            | 39            | 39             | 39             |
| 6     | NHC-600 <sup>a</sup>       | 48            | 51            | 48             | 51             |
| 7     | 1.3Ni@NHC-600 <sup>a</sup> | 86            | 86            | 86             | 86             |
| 8     | 1.3Ni@NHC-600 <sup>b</sup> | 87            | 88            | 87             | 88             |
| 9     | 1.3Ni@NHC-600 <sup>c</sup> | <1            | —             | —              | —              |
| 10    | 0.8Ni@NHC-600 <sup>d</sup> | 80            | 80            | 80             | 80             |
| 11    | Ni/NHC-600 <sup>e</sup>    | 74            | 73            | 74             | 73             |

<sup>a</sup> Catalyst pyrolyzed under N<sub>2</sub> atmosphere.

<sup>b</sup> The reaction was scaled up 20 times.

<sup>c</sup> The reaction was carried out in water as the solvent, in the absence of 1,2,3,4-tetrahydroquinoline.

<sup>d</sup> Ni content is determined to be 0.8wt% by ICP analysis.

<sup>e</sup> Catalyst prepared via impregnation with 1.3 wt% Ni content.

Reaction conditions: nitrobenzene (0.5 mmol), 1,2,3,4-tetrahydroquinoline (0.75 mmol), catalyst (60 mg), H<sub>2</sub>O (3 mL), 145 °C, 6 h, N<sub>2</sub>.

**Table S5.** Performance comparison of reported catalysts in transfer hydrogenation reaction between nitrobenzene and 1,2,3,4-tetrahydroquinoline

| Catalysts                     | $W_{\text{cat.}}$<br>(mg) | T<br>(°C) | $n_{\text{NB}}$<br>(mmol) | t<br>(h) | Aniline<br>yield (%) | Quinoline<br>yield (%) | $R^a$ | TOF <sup>b</sup> | Ref.      |
|-------------------------------|---------------------------|-----------|---------------------------|----------|----------------------|------------------------|-------|------------------|-----------|
| 1.3Ni@NHC-600<br>(1.3 wt% Ni) | 60                        | 145       | 0.5                       | 6        | 90                   | 90                     | 1.250 | 6.27             | This work |
| NHC-600                       | 60                        | 145       | 0.5                       | 6        | 73                   | 72                     | 1.014 | —                | This work |
| Co/mNC-500<br>(14.08 wt%Co)   | 20                        | 160       | 0.4                       | 24       | 91                   | 96                     | 0.758 | 0.35             | [1]       |
| Ni@NCF-700<br>(50.13 wt%Ni)   | 50                        | 145       | 0.5                       | 18       | 97                   | 96                     | 0.550 | 0.065            | [2]       |
| Co-N-C-900<br>(1.12 wt% Co)   | 50                        | 145       | 0.125                     | 24       | 98                   | 98                     | 0.102 | 0.532            | [3]       |
| ONC <sub>0.4</sub> -800       | 20                        | 180       | 0.4                       | 24       | 90                   | 91                     | 0.750 | —                | [4]       |
| FBC-850                       | 50                        | 140       | 0.5                       | 14       | 94                   | 92                     | 0.671 | —                | [5]       |

<sup>a</sup> Reaction activity ( $R$ ) was calculated based on catalyst amount and nitrobenzene ( $NB$ ) conversion,  $\text{mmol}_{\text{NB}}/(\text{g}_{\text{cat.}} \cdot \text{h})$

<sup>b</sup> TOF was calculated based on the total metal molar amounts in the catalyst and nitrobenzene conversion,  $\text{h}^{-1}$



**Table S6.** Bond lengths of N-H and Ni-H in TS7 and TS8

| Catalysts     | Bond | Bond length (TS7) | Bond length (TS8) |
|---------------|------|-------------------|-------------------|
| NHC-600       | N-H  | 1.05 Å            | 1.25 Å            |
| 1.3Ni@NHC-600 | Ni-H | 2.48 Å            | 1.67 Å            |
|               | N-H  | 1.27 Å            | 1.50 Å            |

## References

- [1] Lu, X.; Qin, J.; Xian, C.; Nie, J.; Li, X.; He, J. Cobalt Nanoparticles Supported on Microporous Nitrogen-Doped Carbon for Efficient Catalytic Transfer Hydrogenation Reaction between Nitroarenes and N-Heterocycles. *Catal. Sci. Technol.*, 2022, 12, 5549–5558.
- [2] Pang, S.; Zhang, Y.; Su, Q.; Liu, F.; Xie, X.; Duan, Z.; Zhou, F.; Zhang, P.; Wang, Y. Superhydrophobic Nickel/Carbon Core–Shell Nanocomposites for the Hydrogen Transfer Reactions of Nitrobenzene and N-Heterocycles. *Green Chem.* 2020, 22, 1996–2010.
- [3] Xu, D.; Liu, R.; Li, J.; Zhao, H.; Ma, J.; Dong, Z. Atomically Dispersed Co-N<sub>4</sub> Sites Anchored on N-Doped Carbon for Aqueous Phase Transfer Hydrogenation between Nitroarenes and Saturated N-Heterocycles. *Appl. Catal. B: Environ.* 2021, 299, 120681.
- [4] Lu, X.; He, J.; Huang, L.; Qin, J.; Ma, Y.; Liu, X.; Zhao, W.; Liu, B.; Zhang, Z. Synergetic Roles of Pyridinic Nitrogen and Carbonyl Sites in Nitrogen-Doped Carbon for the Metal-Free Transfer Hydrogenation Reactions. *Appl. Catal. B: Environ.* 2023, 324, 122277.
- [5] Pang, S.; Xi, X.; Liu, S.; Wang, B.; Liang, J.; Zhang, Y.; Chen, Q.; Su, Q.; Wang, Y. Superhydrophobic Biochars as Catalysts for Efficient Hydrogen Transfer in N-heterocycles and Nitrobenzene Reactions. *Fuel*, 2024, 372, 132224.

#### 4. Supplementary Gas Chromatography and Mass Spectrometry

GC spectrum:

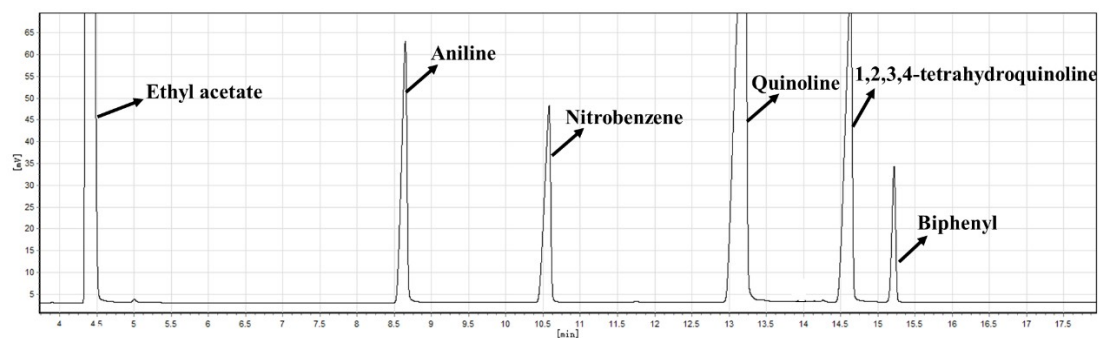

Mass spectrometry:

3a: Aniline

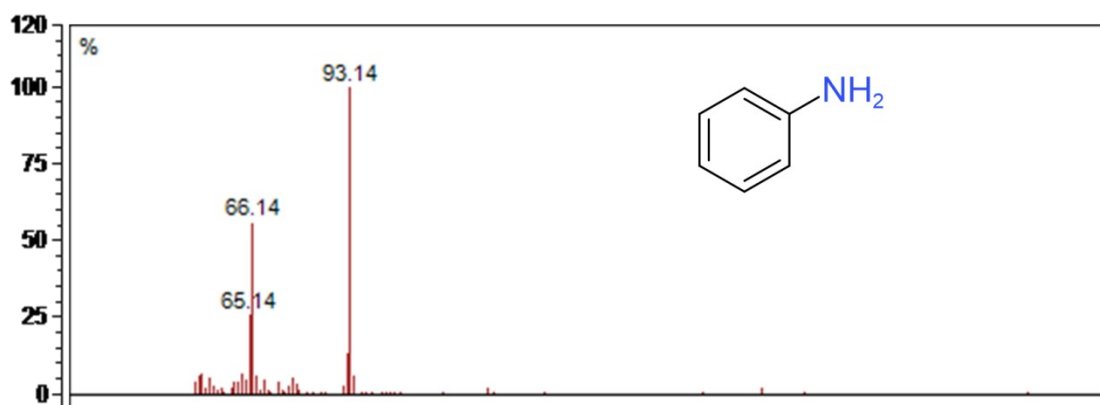

3b: 1-Amino-2-methylbenzene

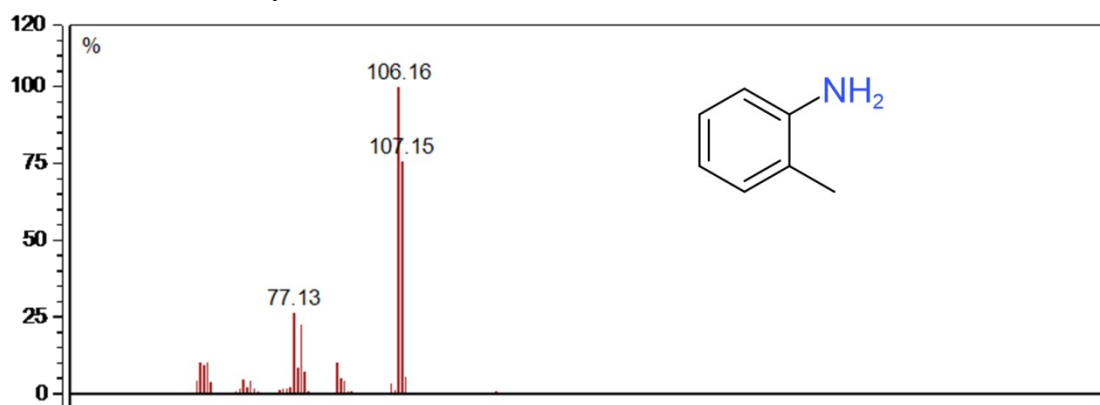

3c: 3-Aminotoluene

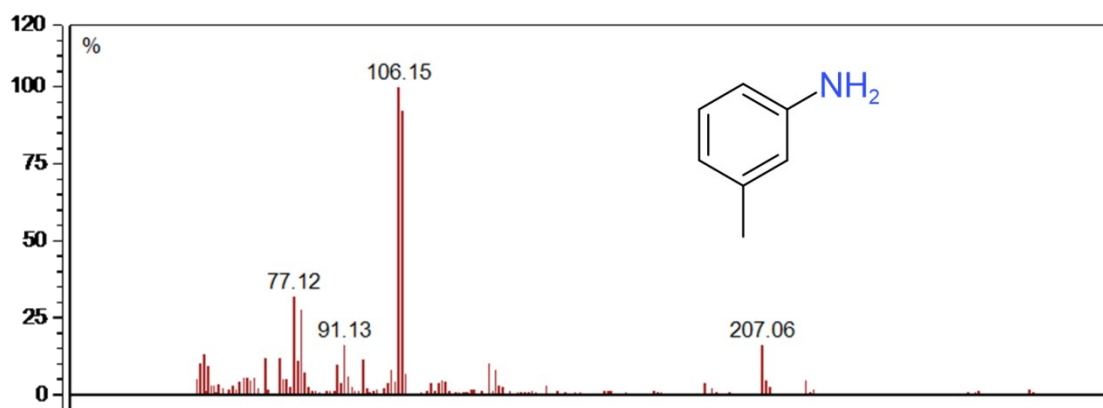

3d: 4-Aminotoluene

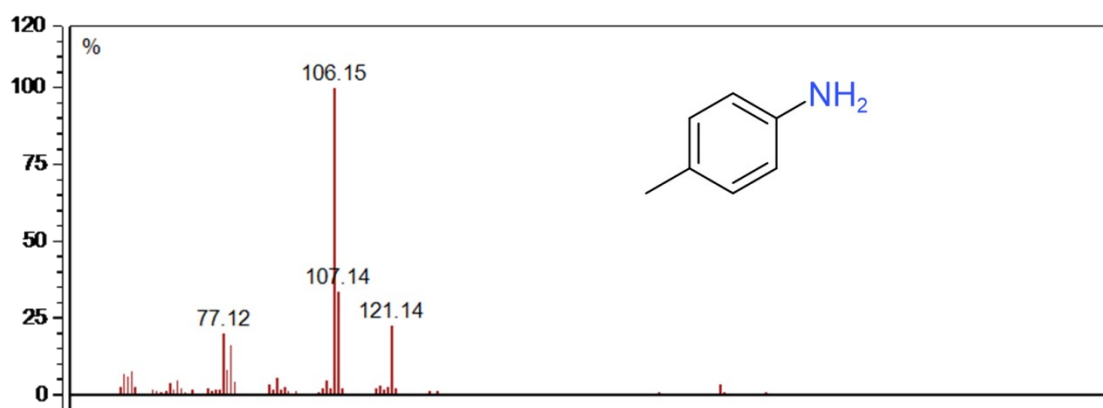

3e: 4-Ethylphenethylamine

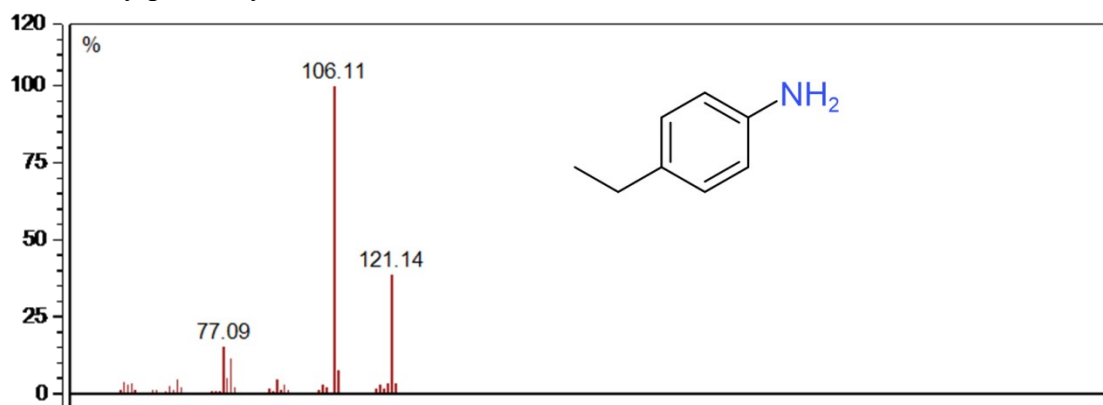

3f: 1,2-Benzenediamine

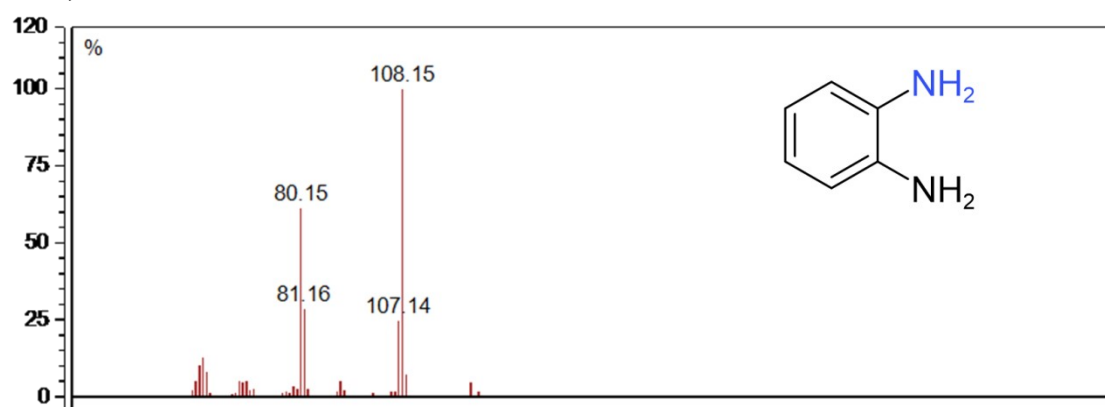

3g: 1,4-Benzenediamine

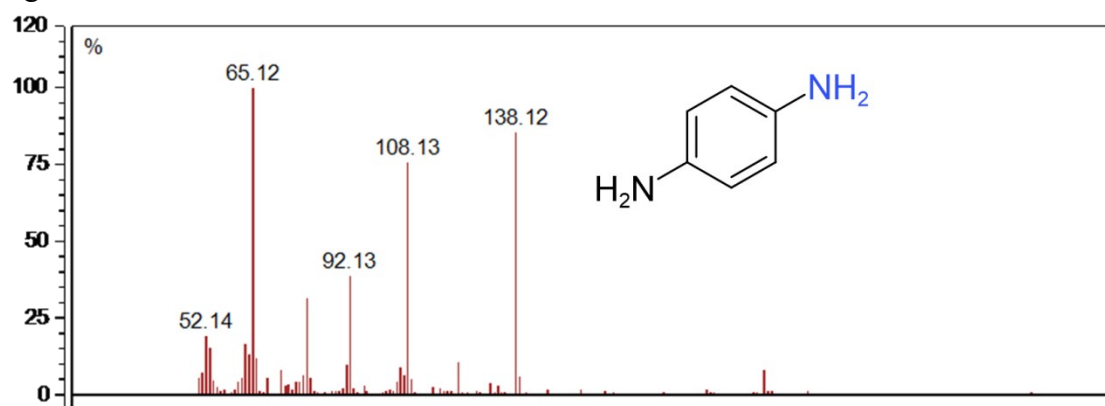

3i: 2-Chloroaniline

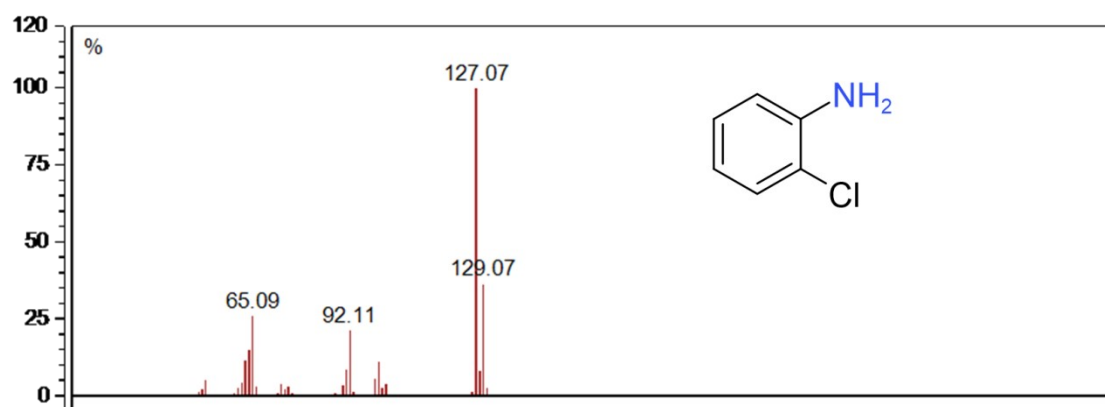

3j: 3-Chloroaniline

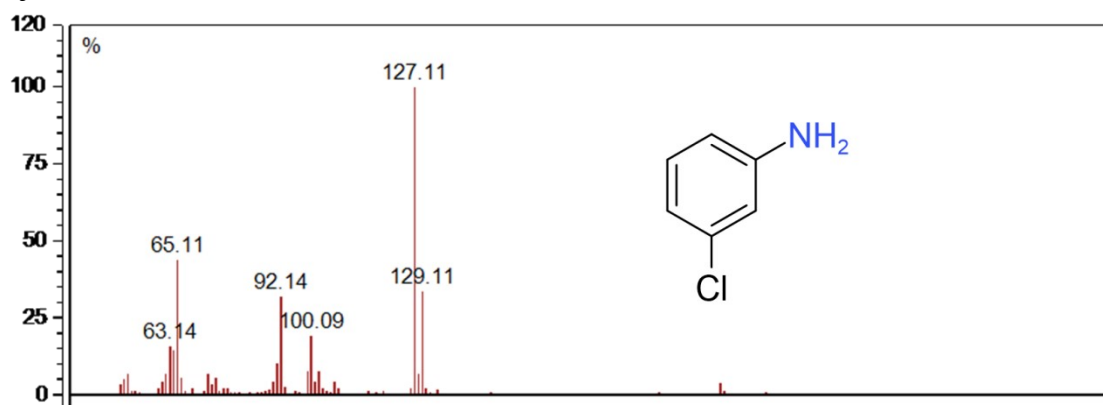

3k: 4-Chloroaniline

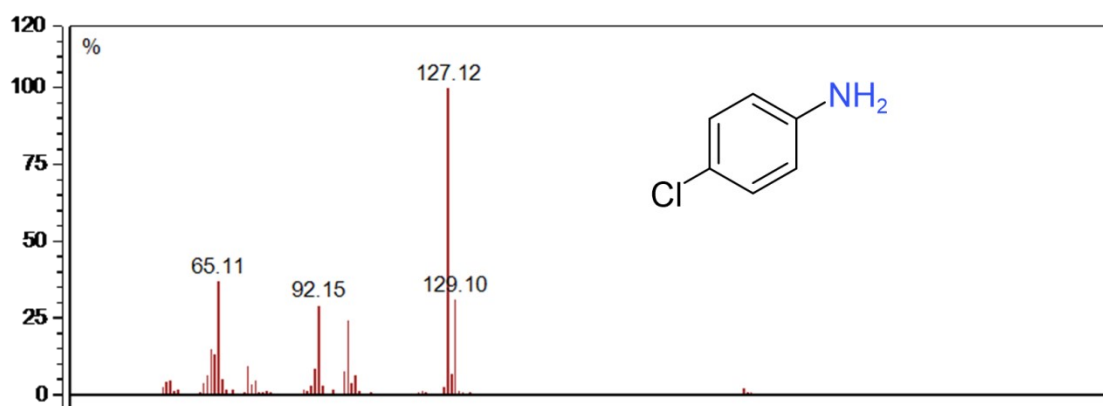

3l: 2-Fluoroaniline

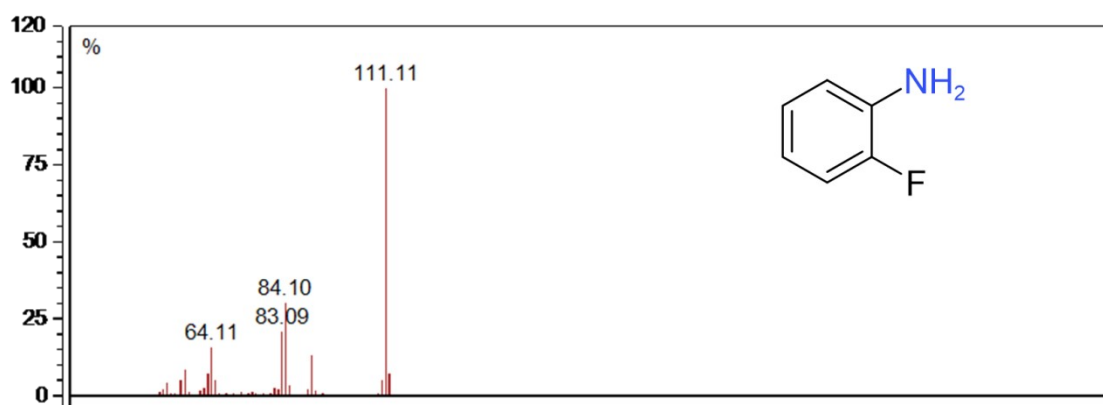

3m: 3-Fluoroaniline

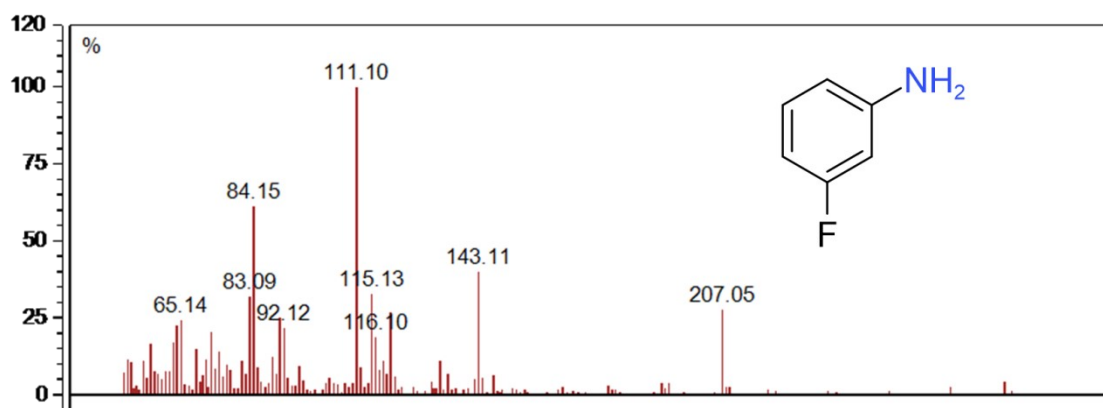

3n: 4-Bromoaniline

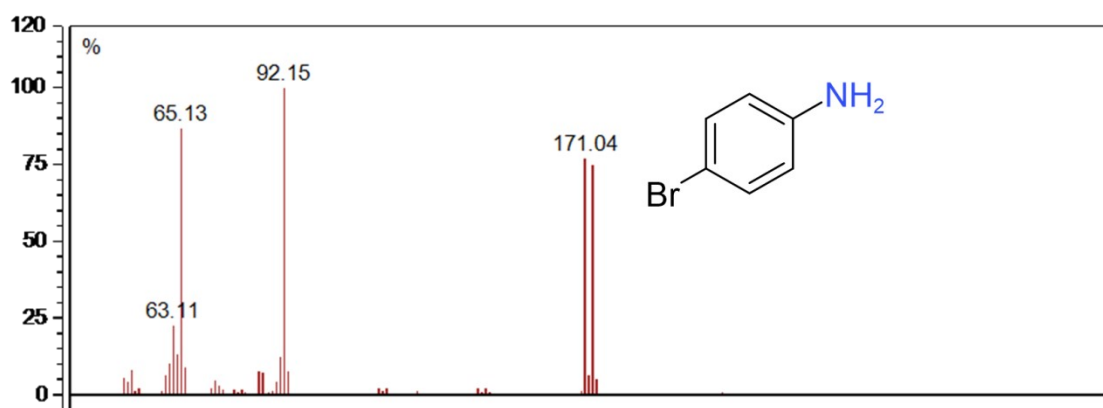

3o: 4-Aminobenzaldehyde

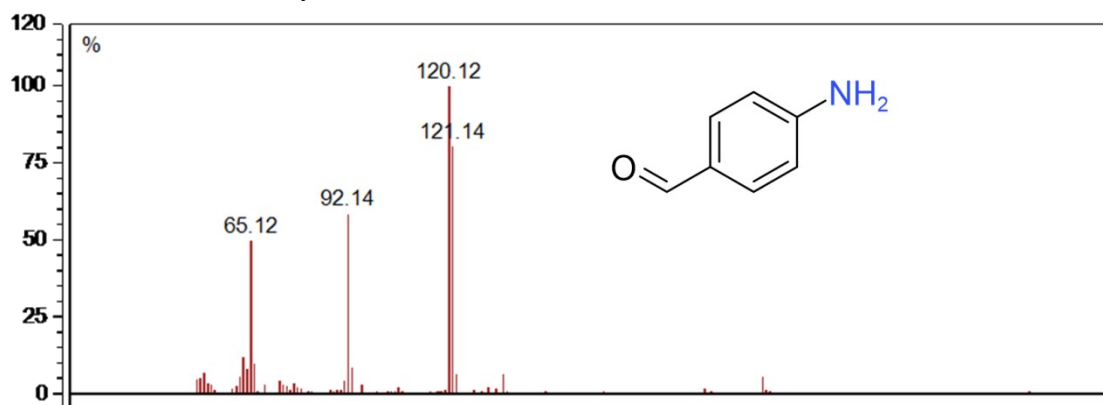

3p: 4-Aminobenzonitrile

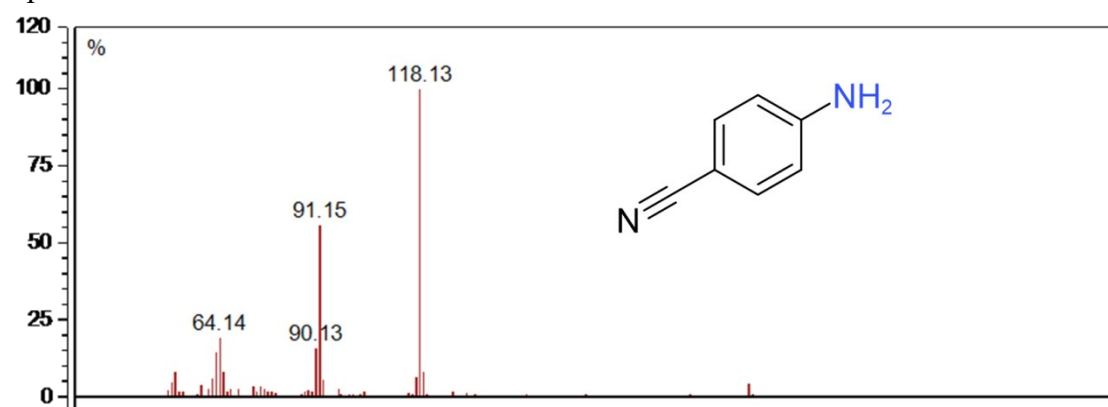

3q: 4-Aminoacetophenone

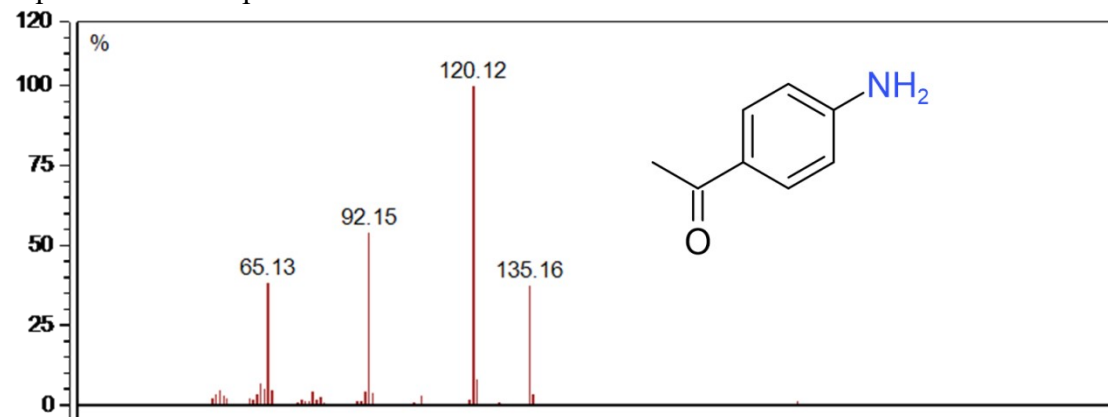

3r: Benzocaine

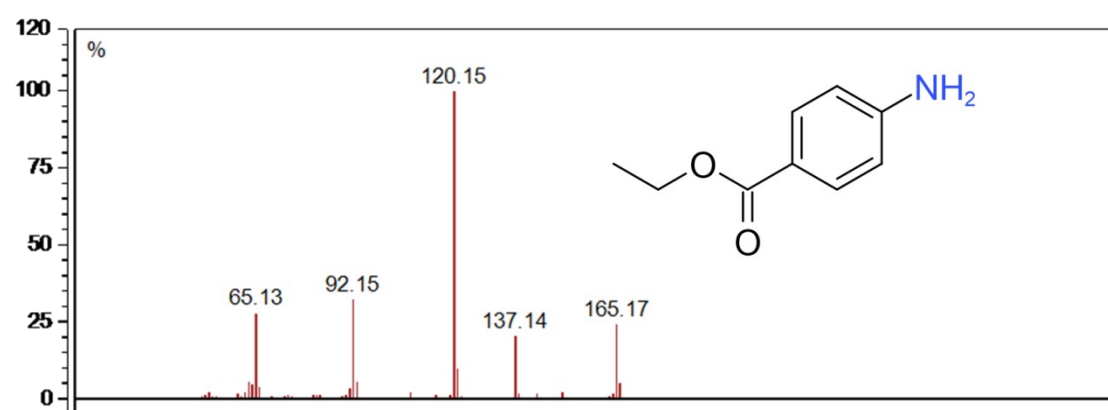



3s: 2-Aminoacetophenone

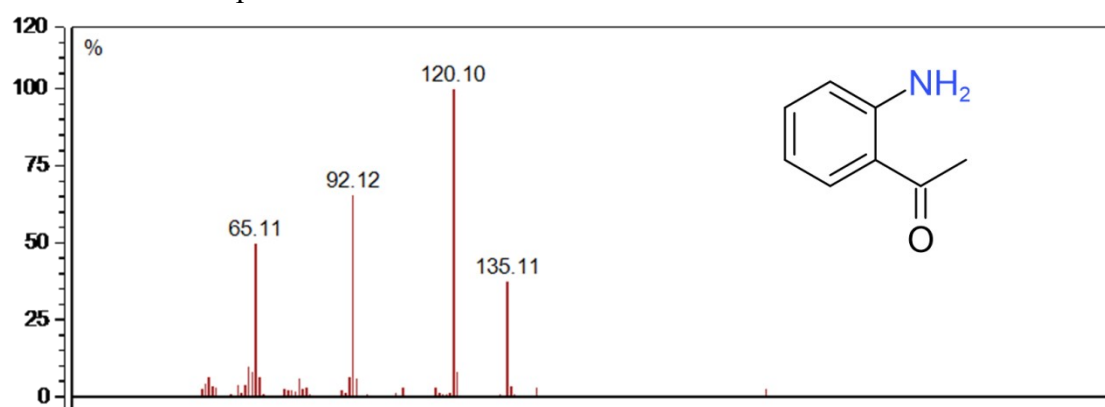

3t: 1-naphthylamine

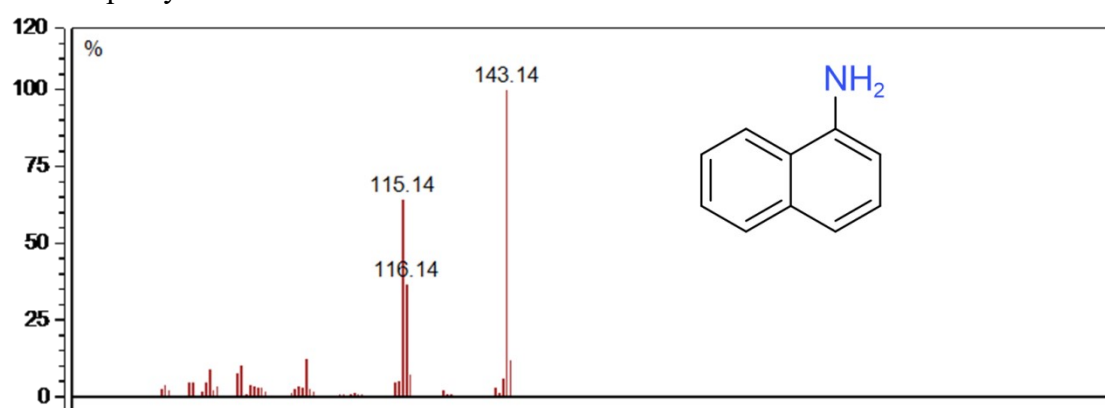

4a: Quinoline

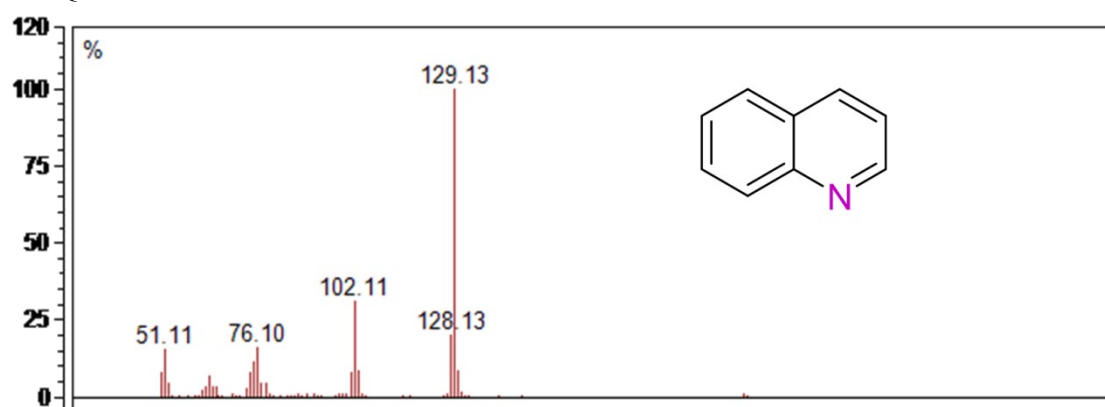

8a: Isoquinoline

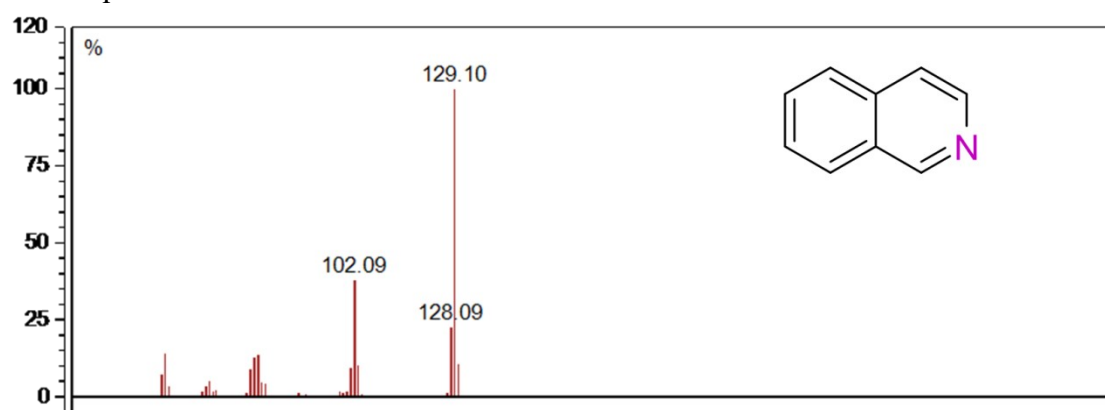

8c: 6-Methylquinoline

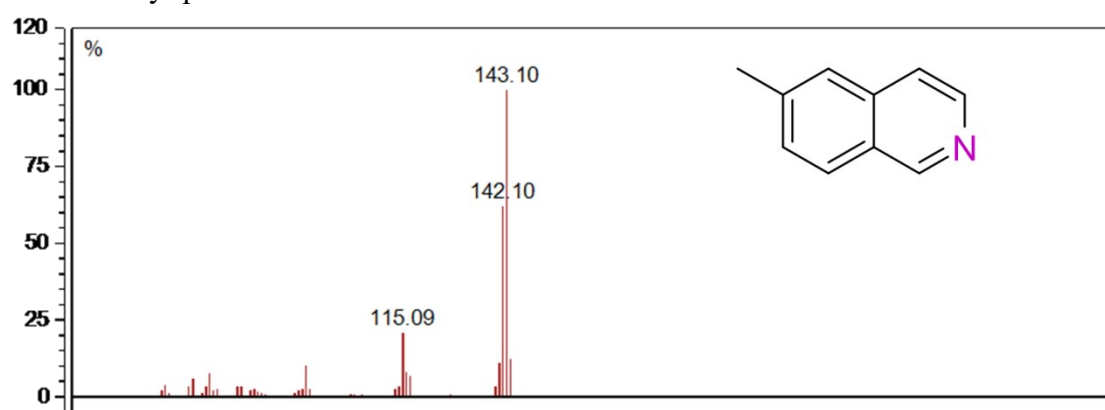

8d: 6-fluoroquinoline

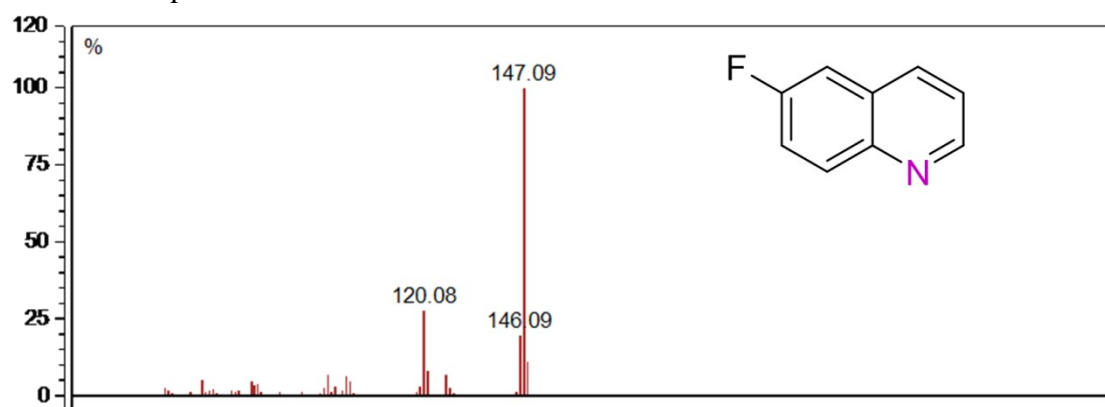

8e: 5-Bromoquinoline

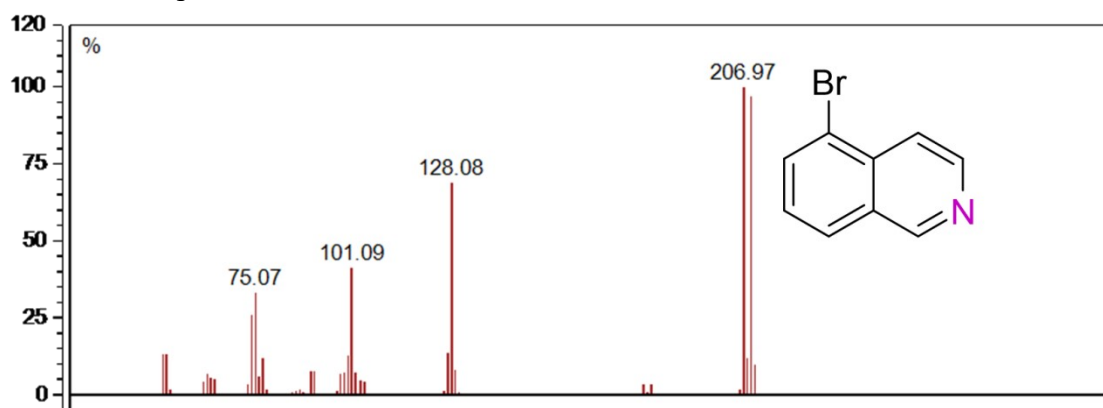

8g: 6-Methoxyquinoline

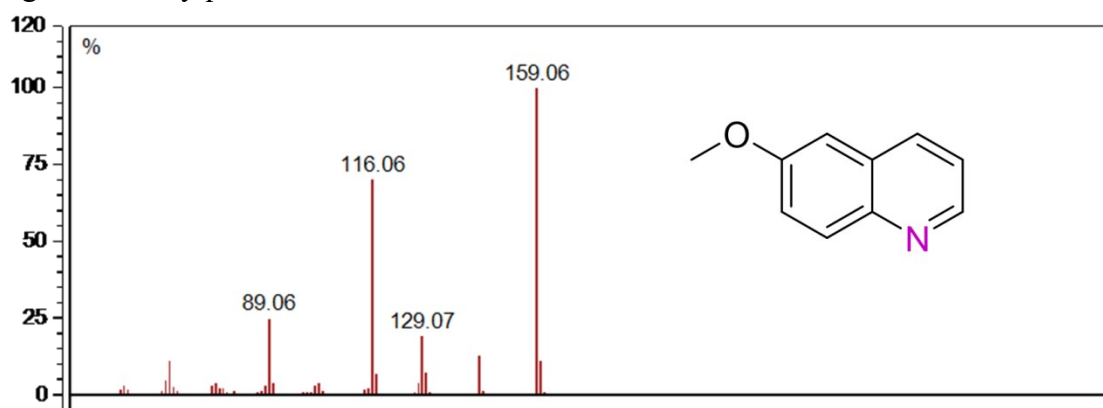

8h: Quinoxaline

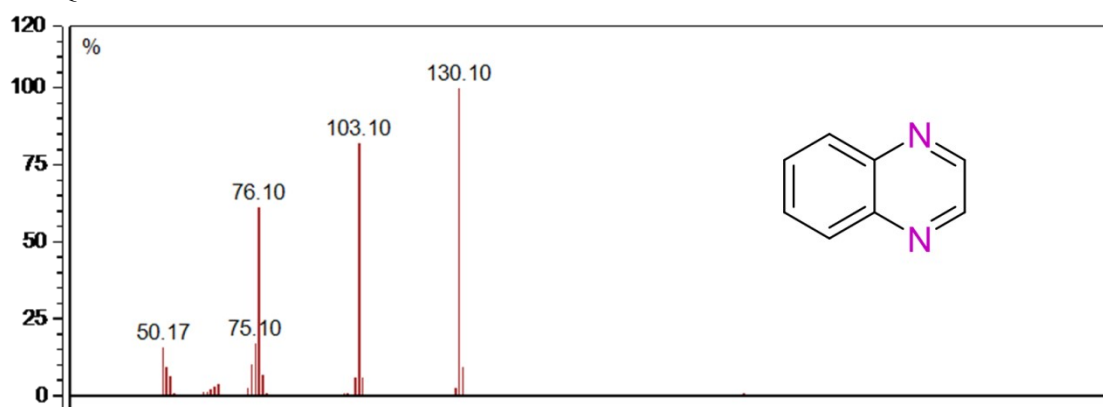

8j: 2-Methylindole

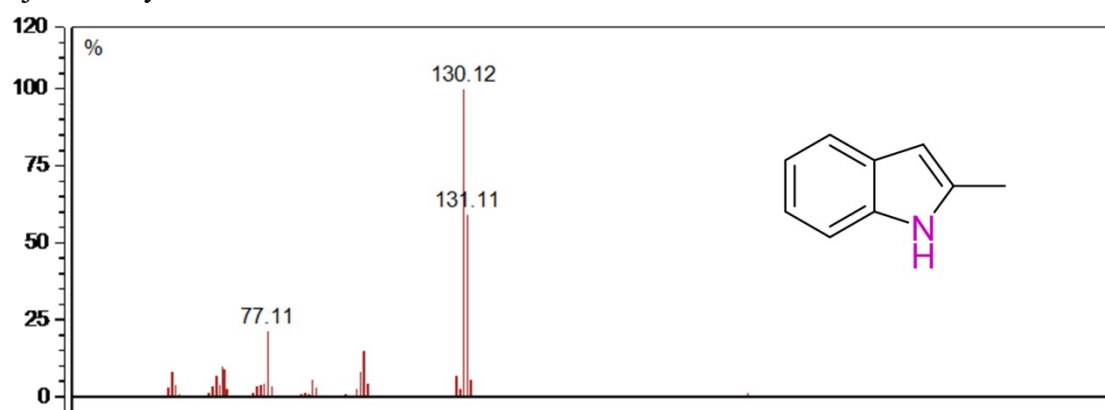

8k: Phenylisoquinoline

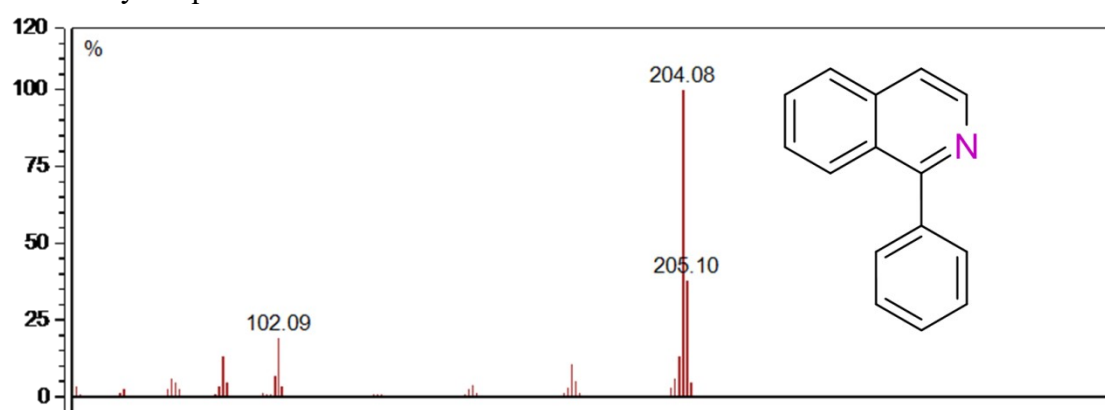

Supplement: d5gc06240c1.pdf [file d5gc06240c1.pdf]
